# Supplementary material for: Ferric particle-assisted LDI-MS platform for metabolic fingerprinting of diabetic retinopathy
Source: publisher site journal article supplement (doi:10.1515/cclm-2023-0775), 2023-11-29
Supplement: Supplementary file 1 [file j_cclm-2023-0775_suppl_001.xlsx]

## Sheet: NOTE
Supplemental Table 1. Participant characteristics
Supplemental Table 2. The performance of sparse learning model and OPLS-DA based on ferric particle-assisted LDI-MS analysis
Supplemental Table 3. Key m/z values from ferric particle-assisted LDI-MS fingerprinting of plasma for differentiating DR and non-DR groups
Supplemental Table 4. Fasting metabolites associated with DR identified using ferric particle-assisted LDI-MS
Supplemental Table 5.Candidate biomarkers with m/z less than 500 identified with ferric particle-assisted LDI-MS
Supplemental Table 6. Metabolites identified using LDI-MS/MS and LDI-FTICR-MS/MS
Supplemental Table 7. Summary of published literatures on circulating metabolomites associated with DR

## Sheet: Table 1_characteristics
Supplemental Table 1. Participant characteristics
	DR	NDR	p value
N	216	216	_
Age (years)	65.7 ± 6.6	66.4 ± 6.6	0.3055
Sex, n (%)	88 (40.6)	88 (40.6)	1
Log duration of diabetes (years)	10.64 (8.68-14.71)	10.48 (8.58-14.59)	0.2753
Body mass index (kg m-2)	26.1 ± 3.50	26.38 ± 3.32	0.5044
Systolic blood pressure (mmHg)	148.11 ± 20.32	151.07 ± 21.14	0.1376
Diastolic blood pressure (mmHg)	78.92 ± 10.88	77.74 ± 11.38	0.2711
Fasting plasma glucose level (mmol L-1)	9.19 ± 2.36	9.35 ± 2.52	0.5003
Prandial plasma glucose level (mmol L-1)	15.86 ± 4.35	16.64 ± 4.16	0.058
Hemoglobin A1c (%)	7.46 ± 1.30	7.51± 1.24	0.674
Hemoglobin A1c (mmol/mol)	60.92 ± 14.14	55.63 ± 13.02	0.674
Log triglycerides (mmol L-1)	1.54 (1.07-2.05)	1.31 (0.92-1.88)	0.0308
Total cholesterol (mmol L-1)	5.22 ± 0.95	5.05 ± 1.14	0.0919
Low-density lipoprotein cholesterol (mmol L-1)	2.83 ± 0.71	2.69 ± 0.78	0.0536
High-density lipoprotein cholesterol (mmol L-1)	1.57 ± 0.39	1.55± 0.42	0.6562
Log urine albumin-to-creatinine ratio (mg g-1)	44.99 (20.72-103.631)	29.91 (13.71-68.91)	0.0049
eGFR (mL/(min·1.73 m2)	128.52 ± 31.54	129.35 ± 28.95	0.7776
ALT (mmol L-1)	27.10 ± 25.87	24.99 ± 15.32	0.3027
Values are mean ± SD or median (interquartile range) or number (proportion). P values were obtained using Student's t-test for continuous variables, χ2 analysis for categorical variables. Abbreviation: DR, diabetic retinopathy, eGFR: estimated glomerular filtration rate, ALT: alanine aminotransferase.

## Sheet: Table 2_machine learning model 
Supplemental Table 2. The performance of machine learning model and OPLS-DA based on ferric particle-assisted LDI-MS analysis
Model	Training set					Testing test
	AUC (95%CI)	Sensitivity	Specificity	Accuracy		AUC (95%CI)	Sensitivity	Specificity	Accuracy
Neural network a)	0.928 (0.902-0.954)	0.8293	0.8902	0.8598		0.905 (0.845-0.965)	0.7692	0.9808	0.875
OPLS-DA b)	0.982 (0.971-0.992)	0.9512	0.9024	0.9268		0.854 (0.782-0.925)	0.6539	0.9231	0.7875
a) 5-fold cross-validation was repeated for 20 rounds using the neural network model with home-built code. b) OPLS-DA based method was performed using SIMCA software. Abbreviation: OPLS-DA: orthogonal partial least squares. LDI-MS: laser desorption/ionization-mass spectrometry, AUC: area under curve.

## Sheet: Table 3_ mz values
Supplemental Table 3. Key m/z values from ferric particle-assisted LDI-MS fingerprinting of plasma for differentiating DR and non-DR groups
Number	m/z	Frequency a)	Coefficient b)	Abundance c)	AUC d)	p-value	FDR e)
1	148.049	100	0.29	385.62	0.6	<0.001*	<0.001*
2	152.951	100	0.43	298.2	0.55	0.022*	0.028*
3	192.05	100	-0.36	131.16	0.63	<0.001*	<0.001*
4	196.95	90	0.09	1162.51	0.58	<0.001*	<0.001*
5	205.049	99	0.12	91.99	0.58	<0.001*	<0.001*
6	208.049	98	-0.13	74.14	0.56	0.04*	0.042*
7	208.951	96	0.09	77.21	0.55	0.031*	0.035*
8	262.049	98	0.16	10.44	0.61	<0.001*	<0.001*
9	384.15	97	0.13	9.07	0.57	0.005*	0.007*
a) The frequency of the single m/z feature selected in 100 neural network models as biomarkers was calculated.b) The scale factor measuring the influence of single m/z feature in model was calculated as the coefficient. c) The average normalized intensity of single m/z feature was calculated as abundance. d) The AUC was calculated using single m/z feature for diagnosis. e) The p-value was correct…

## Sheet: Table 4_permetabolite
Supplemental Table 4. Fasting metabolites associated with DR identified using ferric particle-assisted LDI-MS
M/Z	Model 1					Model 2					Model 3					Model 4					Model 5
	OR	95%CI		FDR-adjusted p value		OR	95%CI		FDR-adjusted p value		OR	95%CI		FDR-adjusted p value		OR	95%CI		FDR-adjusted p value		OR	95%CI		FDR-adjusted p value
		LL	UL				LL	UL				LL	UL				LL	UL				LL	UL
105.05	0.999	0.999	1	0.0024*		0.999	0.999	1	0.006*		0.999	0.999	1	0.007*		0.999	0.999	1	0.009*		0.999	0.999	1	0.014*
121.051	0.999	0.999	1	<0.001*		0.999	0.999	1	<0.001*		0.999	0.999	1	<0.001*		0.999	0.999	1	<0.001*		0.999	0.999	1	0.003*
122.951	0.998	0.997	0.999	0.0024*		0.998	0.997	0.999	0.004*		0.998	0.997	0.999	<0.001*		0.998	0.997	0.999	<0.001*		0.998	0.997	0.999	<0.001*
136.951	0.999	0.999	1	<0.001*		0.999	0.999	1	<0.001*		0.999	0.999	1	<0.001*		0.999	0.999	1	<0.001*		0.999	0.999	1	<0.001*
148.05	1.003	1.002	1.005	<0.001*		1.004	1.002	1.005	<0.001*		1.003	1.002	1.005	<0.001*		1.003	1.002	1.005	<0.001*		1.003	1.002	1.005	<0.001*
149.95	0.996	0.993	1	0.032*		0.997	0.994	1	0.083		0.997	0.993	1	0.073		0.997	0.993	1	0.072		0.996	0.993	1	0.059
152.951	1.006	1.001	1.011	0.028*		1.007	1.002	1.012	0.016*		1.006	1	1.011	0.057		1.006	1	1.011	0.06		1.006	1	1.011	0.047*
163.95	1.004	1.002	1.007	<0.001*		1.005	1.002	1.007	<0.001*		1.004	1.002	1.007	0.003*		1.004	1.002	1.007	0.003*		1.004	1.002	1.007	0.003*
169.049	1.004	1.001	1.008	0.028*		1.005	1.001	1.008	0.025*		1.004	1	1.007	0.079		1.003	1	1.007	0.087		1.003	0.999	1.007	0.195
192.051	0.988	0.983	0.994	<0.001*		0.989	0.983	0.994	<0.001*		0.987	0.981	0.993	<0.001*		0.987	0.981	0.993	<0.001*		0.986	0.98	0.992	<0.001*
196.95	1.001	1.001	1.002	<0.001*		1.001	1.001	1.002	<0.001*		1.001	1.001	1.002	0.003*		1.001	1	1.002	0.003*		1.001	1	1.002	0.003*
205.05	1.023	1.011	1.036	<0.001*		1.025	1.012	1.037	<0.001*		1.021	1.008	1.034	0.003*		1.021	1.008	1.034	0.003*		1.019	1.006	1.033	0.007*
208.049	0.987	0.976	0.999	0.042*		0.988	0.976	1	0.051		0.983	0.971	0.996	0.017*		0.983	0.971	0.996	0.016*		0.979	0.966	0.992	0.004*
208.951	1.017	1.002	1.033	0.035*		1.017	1.002	1.033	0.036*		1.012	0.996	1.029	0.134		1.012	0.996	1.029	0.131		1.009	0.993	1.026	0.283
221.05	1.021	1.008	1.034	0.003*		1.022	1.008	1.035	0.006*		1.018	1.005	1.032	0.014*		1.018	1.004	1.032	0.015*		1.017	1.003	1.031	0.027*
226.051	0.976	0.948	1.005	0.102		0.975	0.946	1.004	0.092		0.972	0.943	1.003	0.079		0.972	0.942	1.002	0.075		0.965	0.935	0.995	0.029*
252.05	1.111	1.068	1.157	<0.001*		1.112	1.068	1.159	<0.001*		1.105	1.061	1.151	<0.001*		1.105	1.06	1.151	<0.001*		1.096	1.052	1.143	<0.001*
262.049	1.146	1.083	1.212	<0.001*		1.145	1.081	1.212	<0.001*		1.138	1.075	1.206	<0.001*		1.137	1.074	1.205	<0.001*		1.129	1.065	1.197	<0.001*
384.15	1.056	1.017	1.097	0.007*		1.054	1.015	1.095	0.011*		1.059	1.018	1.101	0.007*		1.058	1.017	1.1	0.009*		1.049	1.007	1.092	0.027*
505.051	1.075	1.026	1.127	0.003*		1.071	1.021	1.123	0.009*		1.07	1.02	1.123	0.010*		1.068	1.018	1.121	0.012*		1.065	1.014	1.118	0.016*
532.35	1.108	1.053	1.167	<0.001*		1.108	1.051	1.167	<0.001*		1.114	1.057	1.173	<0.001*		1.112	1.055	1.173	<0.001*		1.105	1.047	1.165	<0.001*
589.65	1.127	1.053	1.206	0.0024*		1.132	1.056	1.213	0.004*		1.142	1.063	1.226	<0.001*		1.141	1.063	1.226	<0.001*		1.13	1.05	1.215	0.003*
614.749	1.138	1.066	1.216	<0.001*		1.135	1.061	1.213	<0.001*		1.141	1.065	1.222	<0.001*		1.139	1.063	1.221	<0.001*		1.138	1.06	1.222	<0.001*
615.551	1.165	1.088	1.247	<0.001*		1.164	1.085	1.247	<0.001*		1.172	1.093	1.257	<0.001*		1.171	1.092	1.255	<0.001*		1.165	1.086	1.251	<0.001*
637.551	1.135	1.06	1.216	<0.001*		1.138	1.061	1.22	<0.001*		1.137	1.06	1.22	<0.001*		1.135	1.057	1.218	<0.001*		1.127	1.048	1.212	0.003*
673.551	1.093	1.047	1.142	<0.001*		1.091	1.044	1.14	<0.001*		1.092	1.045	1.14	<0.001*		1.091	1.044	1.139	<0.001*		1.086	1.04	1.135	<0.001*
688.549	1.132	1.059	1.209	<0.001*		1.13	1.057	1.208	<0.001*		1.133	1.059	1.212	<0.001*		1.132	1.058	1.211	<0.001*		1.123	1.048	1.203	0.003*
698.25	1.166	1.07	1.27	<0.001*		1.169	1.071	1.275	<0.001*		1.197	1.094	1.31	<0.001*		1.198	1.095	1.312	<0.001*		1.197	1.091	1.313	<0.001*
749.75	1.144	1.071	1.222	<0.001*		1.142	1.068	1.221	<0.001*		1.148	1.072	1.23	<0.001*		1.146	1.07	1.228	<0.001*		1.136	1.059	1.218	<0.001*
817.342	1.192	1.09	1.304	<0.001*		1.196	1.092	1.31	<0.001*		1.212	1.102	1.333	<0.001*		1.211	1.101	1.332	<0.001*		1.199	1.089	1.321	<0.001*
869.65	1.145	1.054	1.243	0.0024*		1.141	1.049	1.24	0.006*		1.152	1.057	1.255	0.003*		1.15	1.056	1.253	0.003*		1.155	1.058	1.262	0.003*
891.85	1.183	1.075	1.303	0.0024*		1.193	1.082	1.315	<0.001*		1.197	1.083	1.323	<0.001*		1.195	1.081	1.321	<0.001*		1.195	1.079	1.323	0.003*
918.716	1.156	1.057	1.264	0.0024*		1.159	1.057	1.27	0.006*		1.166	1.061	1.282	0.003*		1.166	1.06	1.281	0.006*		1.165	1.057	1.284	0.004*
919.713	1.159	1.065	1.262	0.0024*		1.163	1.066	1.268	0.004*		1.18	1.079	1.291	<0.001*		1.178	1.076	1.289	<0.001*		1.172	1.069	1.284	0.003*
927.689	1.142	1.051	1.241	0.0035*		1.135	1.043	1.235	0.006*		1.149	1.053	1.255	0.005*		1.149	1.053	1.254	0.006*		1.142	1.046	1.248	0.006*
943.731	1.195	1.094	1.306	<0.001*		1.193	1.091	1.306	<0.001*		1.207	1.101	1.323	<0.001*		1.206	1.099	1.322	<0.001*		1.197	1.09	1.313	<0.001*
947.657	1.131	1.041	1.229	0.0048*		1.124	1.034	1.222	0.010*		1.135	1.041	1.238	0.007*		1.134	1.04	1.237	0.009*		1.132	1.036	1.238	0.010*
990.03	1.141	1.054	1.234	0.0024*		1.145	1.056	1.242	0.004*		1.151	1.059	1.251	0.003*		1.149	1.058	1.249	0.003*		1.132	1.041	1.232	0.007*
Metabolites associated with DR using per-metabolite logistic regression models after adjustment for unadjusted model (model 1), model 1+age, sex, drinking and smoking, duration of diabetes (model 2),model 2+systolic and diastolic blood pressure (model 3), model 3+BMI (model 4), model4+ HbA1c, TC, TG, HDL-C, LDLC(model 5). Benjamini-Hochberg false discovery rate correction p value ≤ 0.05 was stati…

## Sheet: Table 5_.Candidate biomarkers
Supplemental Table 5.Candidate biomarkers with m/z less than 500 identified with ferric particle-assisted LDI-MS
M/Z in LDI-MS	Metabolite	HMDB ID
105.05	Fomepizole	HMDB0015344
	Sulfite	HMDB0000240
121.05	3,4-dihydroxybutyric acid	HMDB0000337
	Sulfate	HMDB0001448
	4-Hydroxymethylpyrazole	HMDB0060768
	Phosphate	HMDB0001429
	2-Hexenal	HMDB0031496
122.951	Hexanal	HMDB0005994
136.951	4-Heptanone	HMDB0004814
	3,4-dihydroxybutyric acid	HMDB0000337
	Trifluoroacetic acid	HMDB0014118
	Dihydrouracil	HMDB0000076
	N-Mononitrosopiperazine	HMDB0061162
	N-Methylhydantoin	HMDB0003646
	Thiosulfate	HMDB0000257
	Heptanal	HMDB0031475
	Methimazole	HMDB0014901
	1-Methylhistamine	HMDB0000898
148.049	1-Methyl-4-nitroimidazole	HMDB0060659
149.949	N-Acetylputrescine	HMDB0002064
152.951	Ketoleucine	HMDB0000695
	Citraconic acid	HMDB0000634
	Selenite	HMDB0011119
	Fluorouracil	HMDB0014684
	3-Methyl-2-oxovaleric acid	HMDB0000491
163.95	Isometheptene	HMDB0015651
169.05	Methylglutaric acid	HMDB0000752
	Ureidoisobutyric acid	HMDB0002031
	Oxoglutaric acid	HMDB0000208
	L-Lysine	HMDB0000182
	P-Dichlorobenzene	HMDB0041971
	L-Glutamine	HMDB0000641
	Solerol	HMDB0002173
	2-Methylglutaric acid	HMDB0000422
	D-Glutamine	HMDB0003423
	Adipic acid	HMDB0000448
	3-Oxoglutaric acid	HMDB0013701
192.051	6-Hydroxydopamine	HMDB0001537
	1-Methylhistidine	HMDB0000001
	5-Hydroxydopamine	HMDB0004817
	3-Methylhistidine	HMDB0000479
	2-Furoylglycine	HMDB0000439
	Norepinephrine	HMDB0000216
	Pyridoxine	HMDB0000239
196.95	Gluconic acid	HMDB0000625
	2-Propylglutaric acid	HMDB0060684
	N2-Acetylornithine	HMDB0003357
	trans-Aconitic acid	HMDB0000958
	cis-Aconitic acid	HMDB0000072
	Dehydroascorbic acid	HMDB0001264
	D-Arginine	HMDB0003416
	Shikimic acid	HMDB0003070
	Suberic acid	HMDB0000893
	L-Arginine	HMDB0000517
205.049	Mannitol	HMDB0000765
	Methyl 4,8-decadienoate	HMDB0034708
	1-Methyluric acid	HMDB0003099
	9-Methyluric acid	HMDB0001973
	Hydroxyphenyllactic acid	HMDB0000755
	3,4-Dihydroxyhydrocinnamic acid	HMDB0000423
	Galactitol	HMDB0000107
	L-Iditol	HMDB0011632
	2,6-Dimethoxybenzoic acid	HMDB0029273
	Succimer	HMDB0014706
	3-(3-Hydroxyphenyl)-3-hydroxypropanoic acid	HMDB0002643
	Sorbitol	HMDB0000247
	Dacarbazine	HMDB0014989
	Ethionamide sulphoxide	HMDB0060624
	3-Methyluric acid	HMDB0001970
208.049	DL-O-Phosphoserine	HMDB0001721
	Phosphoserine	HMDB0000272
	6-hydroxychlorzoxazone	HMDB0060998
208.951	Carbimazole	HMDB0014533
	2-Phosphoglyceric acid	HMDB0000362
	3-Phosphoglyceric acid	HMDB0000807
221.049	3-(3,4-Dihydroxyphenyl)lactic acid	HMDB0003503
	Vanillylmandelic acid	HMDB0000291
	5Z-Dodecenoic acid	HMDB0000529
	Dechloroethyl cyclophosphamide	HMDB60881
226.051	L-Acetylcarnitine	HMDB0000201
	Cystathionine ketimine	HMDB0002015
	3-Indolebutyric acid	HMDB0002096
252.05	Ergothioneine	HMDB0003045
	Butenylcarnitine	HMDB0013126
262.049	Dihydrobiopterin	HMDB0000038
	4a-Carbinolamine tetrahydrobiopterin	HMDB0002215
	Isoetharine	HMDB0014366
	9-Carboxymethoxymethylguanine	HMDB0060805
	Benzphetamine	HMDB0015003
384.15	Bezafibrate	HMDB0015465
	N-Arachidonoylglycine	HMDB0005096
	Ofloxacin	HMDB0015296
Only 19 of 38 potential metabolic m/z values with m/z less than 500 were shown . Others with m/z greater than 500 were not shown for the difficulty in being identified, most of them were liposomes.

## Sheet: Table 6_Metabolites identified 
Supplemental Table 6. Metabolites identified using LDI-MS/MS and LDI-FTICR-MS/MS
Number	M/Z in LDI-TOF MS	Metabolite	HMDB ID	Metabolite measurement methods
1	148.049	3-Methylhistamine	HMDB01861	LDI-FTICR-MS/MS
2	152.951	Citraconic acid	HMDB00634	LDI-MS/MS and LDI-FTICR-MS/MS
3	192.05	2-Furoylglycine	HMDB00439	LDI-FTICR-MS/MS
4	196.95	Gluconic acid	HMDB00625	LDI-FTICR-MS/MS
5	205.049	3-Methyluric acid	HMDB01970	LDI-MS/MS and LDI-FTICR-MS/MS
6	208.049	Phosphoserine	HMDB00272	LDI-MS/MS and LDI-FTICR-MS/MS
7	208.951	3-Phosphoglyceric acid	HMDB00807	LDI-FTICR-MS/MS
8	262.049	Dihydrobiopterin	HMDB00038	LDI-FTICR-MS/MS
9	384.15	N-Arachidonoylglycine	HMDB05096	LDI-MS/MS and LDI-FTICR-MS/MS
Abbreviation: LDI-FTICR-MS/MS: Laser Desorption/Ionization Time of Flight Mass Spectrometry.

## Sheet: Table 7_Summary
Supplemental Table 7. Summary of published literatures on circulating metabolomites associated with DR
Year	Reference	Metabolites measurement platform	Ancestry	Participants	Sigficant Metabolites	Pathways
2011	8	Gas chromatography-mass spectrometry	Chinese	89 patients with diagnosed T2DM, with or without DR, and 30 healthy people were recruited for the study	Pyruvic acid and L-aspartic acid	Unclear
2016	5	Gas chromatography-mass spectrometry	Singapore Indian	40 patients with diabetes with DR and 40 patients with diabetes without DR	2-deoxyribonic acid; 3,4-dihydroxybutyric acid; erythritol; gluconic acid; and ribose	Pentose phosphate pathway
2018	9	Gas chromatography time-of-flight mass spectrometry and ultra-performance liquid chromatography-quadrupole time-of-flight mass spectrometry	Korea	124 were diagnosed with DR; 72 had NPDR and 52 had PDR.	Glutamine and glutamic acid	Unclear
2019	10	Liquid chromatography-mass spectrometry	Unclear	83 DR patients and 90 diabetic controls	126 metabolic features	β-oxidation of saturated fatty acids, fatty acid metabolism, and vitamin D3 metabolism
2020	7	Gas chromatography-mass spectrometry and liquid chromatography-mass spectrometry	Chinese	905 subjects with diabetes without DR (NDR) and with DR at different clinical stages	348 and 290 metabolites are significantly associated with the pathogenesis of DR and early-stage DR. 12-hydroxyeicosatetraenoic acid and 2-piperidone exhibited better diagnostic performance than HbA1c.	Glycolysis metabolism, tricarboxylic acid cycle, urea cycle metabolism, polyol metabolism, amino acid metabolism
2020	28	Two-dimensional gas chromatography with time-of-flight mass spectrometry and lipidomic analyses using an ultra-high-performance liquid chromatography quadruple time-of-flight mass spectrometry	Caucasoid	648 individuals with type 1 diabetes. Subjects were subdivided into no DR, mild nonproliferative DR (NPDR), moderate NPDR, proliferative DR, and proliferative DR with fibrosis	2,4 dihydroxybutyric acid, 3,4-dihydroxybutyric acid , ribonic acid, ribitol, and the triglycerides 50:1 and 50:2	Unclear
2023	29	Nontargeted relative quantitative liquid chromatography-tandem mass spectrometry	Finland	A 12-year follow-up study including 1349 participants with type 2 diabetes (1021 without DR, 328 with DR)	N-lactoyl isoleucine, N-lactoyl valine, N-lactoyl tyrosine, and N-lactoyl phenylalanine, N-(2-furoyl) glycine, 5-hydroxylysine, N,N,N-trimethyl-5-aminovalerate, myristoleate (14:1n5), palmitoleate (16:1n7), 5-dodecenoate (12:1n7) ,sphingomyelin (d18:2/24:2), carboxylic acid maleate, 3-hydroxypyridine sulfate, 4-vinylphenol sulfate, 4-ethylcatechol sulfate, and dimethyl sulfone	Unclear
